# Supplementary material for: Bariatric Surgery-Induced Resolution of Hypertension and Obstructive Sleep Apnea: Impact of Modulation of Body Fat, Ectopic Fat, Autonomic Nervous Activity, Inflammatory and Adipokine Profiles
Source: Springer Nature journal article supplement (doi:10.1007/s11695-017-2737-z), 2017-05-29
Supplement: MOESM1 [file 12322850]

**Online Supplements**

**Bariatric Surgery-Induced Resolution of Hypertension and Obstructive Sleep Apnea: Effect of Body Fat, Ectopic Fat, Autonomic Nervous Activity, Inflammatory and Adipokines Profiles Modulation.**

**Supplemental table 1. Baseline blood measurements and vital signs of severely obese patients according to hypertension and sleep apnea status.**

|  | **All patients (n=62)** | | | **All patients (n=62)** | | |
| --- | --- | --- | --- | --- | --- | --- |
|  | **HTN** | **Without HTN** | p value within group a | **OSA** | **Without OSA** | p value within group b |
|  | (n=35) | (n=27) | (n=32) | (n=30) |
| **Blood measurement** |  |  |  |  |  |  |
| Hemoglobin, g/L | 136.7±13.1 | 127.3±24.8 | 0.09 | 130.0±24.4 | 135.3±12.1 | 0.08 |
| Creatinine, μmol/L | 68.0±17.0 | 65.7±8.2 | 0.26 | 68.8±16.2 | 65.1±10.7 | 0.38 |
| Urea, mmol/L | 5.3±1.6 | 4.7±1.1 | 0.54 | 5.3±1.7 | 4.9±1.1 | 0.47 |
| Leptin, ng/mL | 60±58 | 64±32 | 0.17 | 63±55 | 60±42 | 0.44 |
| Adiponectin, μg/mL | 6.0±4.8 | 8.5±8.2 | 0.44 | 6.3±4.8 | 7.8±7.9 | 0.19 |
| Orexin, ng/mL | 3.00±0.85 | 3.49±1.67 | 0.51 | 3.08±1.03 | 3.39±1.54 | 0.39 |
| Vaspin, ng/mL | 1.97±1.26 | 2.74±1.27 | 0.32 | 2.14±1.40 | 2.47±1.11 | 0.63 |
| Nesfatin-1, ng/mL | 1.85±0.57 | 2.26±1.71 | 0.51 | 1.96±1.25 | 2.11±1.24 | 0.51 |
| Chemerin, ng/mL | 165±46 | 167±62 | 0.19 | 175±56 | 156±49 | 0.19 |
| Omentin, ng/mL | 12.1±7.1 | 11.0±4.7 | 0.23 | 12.1±6.8 | 11.1±5.4 | 0.15 |
| Insulin, ρmol/L | 172±74 | 140±67 | 0.17 | 171±81 | 145±60 | 0.08 |
| Interleukin 6, ρg/mL | 9.90±23.52 | 5.40±3.74 | 0.27 | 5.27±3.09 | 11.61±27.22 | 0.56 |
| TNF-α, ρg/mL | 2.04±2.97 | 1.75±1.63 | 0.67 | 2.20±3.28 | 1.59±0.90 | 0.54 |
| hs-CRP, mmol/L | 8.9±7.8 | 8.9±6.9 | 0.34 | 7.8±6.6 | 10.1±7.8 | 0.11 |
| **Vital signs** |  |  |  |  |  |  |
| Systolic blood pressure, mmHg | 137±13 | 128±11 | 0.06 | 136±14 | 132±17 | 0.03 |
| Diastolic blood pressure, mmHg | 83±8 | 81±9 | 0.22 | 83±8 | 83±11 | 0.27 |
| Resting heart rate, bpm | 80±11 | 76±11 | 0.34 | 80±10 | 77±11 | 0.22 |

**Supplemental table 1 legend.**

Abbreviations. HTN: hypertension, OSA: obstructive sleep apnea, TNF-α: tumor necrosis factor alpha, hs-CRP: high-sensitive C-reactive protein.

Data are mean ± standard deviation. a: between patients with and without HTN, adjusted for age, sex, type 2 diabetes and OSA. b: between patients with and without OSA, adjusted for age, sex and type 2 diabetes. Interleukin-6, TNF-α and hs-CRP are logarithmically transformed for statistical analysis. Log transformed p values are provided.

**Supplemental table 2. Post-operative evolution of blood measurements according to hypertension status.**

|  | **Patients who underwent bariatric surgery (n=40)** | | | p value  (overall) |
| --- | --- | --- | --- | --- |
|  | **Without HTN** | **HTN resolved** | **HTN unresolved** |
|  | (n=15) | (n=11) | (n=14) |
| Leptin, ng/mL | -60±14 | -63±18 | -54±14 | 0.21 |
| Adiponectin, μg/mL | 2.9±4.1 | 4.5±8.6 | -4.1±4.4 | 0.11 |
| Orexin, ng/mL | 0.3±1.6 | 0.6±3.3 | 0.26±1.23 | 0.19 |
| Vaspin, ng/mL | 1.22±2.38 | 0.81±2.13 | 0.35±0.47 | 0.49 |
| Nesfatin-1, ng/mL | -0.91±1.16 | -0.39±0.39 | -0.77±0.64 | 0.36 |
| Chemerin, ng/mL | -81±73 | -43±50 | -65±61 | 0.82 |
| Omentin, ng/mL | -0.67±6.39 | 2.57±7.21 | 4.56±8.04 | 0.31 |
| Insulin, ρmol/L | -117±66 | -151±64 | -121±101 | 0.26 |
| Interleukin 6, ρg/mL | -1.18±3.22 | -1.83±1.67 | -0.78±3.57 | 0.48 |
| TNF-α, ρg/mL | 0.90±3.00 | 0.17±0.58 | 0.54±1.91 | 0.66 |
| hs-CRP, mmol/L | -7.7±5.5 | -7.5±5.6 | -5.8±6.9 | 0.21 |

**Supplemental table 2 legend.**

Abbreviations. HTN: hypertension, TNF-α: tumor necrosis factor alpha, hs-CRP: high-sensitive C-reactive protein.

Data are mean ± standard deviation. p value adjusted for age, sex, type 2 diabetes and obstructive sleep apnea. Orexin, vaspin, omentin, interleukin-6, TNF-α and hs-CRP are logarithmically transformed for statistical analysis. Log transformed p values are provided.

**Supplemental table 3. Post-operative evolution of blood measurements according to obstructive sleep apnea status.**

|  | **Patients who underwent bariatric surgery (n=40)** | | | p value  (overall) |
| --- | --- | --- | --- | --- |
|  | **Without OSA** | **OSA resolved** | **OSA unresolved** |
|  | (n=14) | (n=20) | (n=6) |
| Leptin, ng/mL | -60±15 | -64±12 | -38±20 | 0.18 |
| Adiponectin, μg/mL | 3.8±1.7 | 4.0±1.4 | 0.6±2.4 | 0.36 |
| Orexin, ng/mL | 0.05±0.70 | 0.29±2.45 | 1.29±2.17 | 0.20 |
| Vaspin, ng/mL | 1.03±1.91 | 0.50±1.68 | 1.30±2.25 | 0.31 |
| Nesfatin-1, ng/mL | -0.68±0.62 | -0.83±1.01 | -0.52±0.31 | 0.44 |
| Chemerin, ng/mL | -62±54 | -71±68 | -50±76 | 0.75 |
| Omentin, ng/mL | 2.26±5.34 | 1.65±9.47 | 2.52±6.30 | 0.47 |
| Insulin, ρmol/L | -104±47 | -140±91 | -141±96 | 0.18 |
| Interleukin 6, ρg/mL | -2.63±0.83 | -0.40±0.68 | -0.78±1.17 | 0.37 |
| TNF-α, ρg/mL | -0.21±0.60 | 1.20±0.48 | 0.11±0.85 | 0.39 |
| hs-CRP, mmol/L | -8.52±5.32 | -4.66±3.97 | -11.29±9.66 | 0.02 a |

**Supplemental table 3 legend.**

Abbreviations. OSA: obstructive sleep apnea, TNF-α: tumor necrosis factor alpha, hs-CRP: high-sensitive C-reactive protein.

Data are mean ± standard deviation. p value adjusted for age, sex and type 2 diabetes. Orexin, vaspin, omentin, interleukin-6, TNF-α and hs-CRP are logarithmically transformed for statistical analysis. Log transformed p values are provided. a: p < 0.05; between OSA resolved and OSA unresolved.
